# Supplementary material for: Small Reduced Graphene Oxides for Highly Efficient Oxygen Reduction Catalysts
Source: MDPI journal article supplement (doi:10.3390/ijms222212300), 2021-11-14
Supplement: s1 [file s1]

# Small Reduced Graphene Oxides for Highly Efficient Oxygen Reduction Catalysts

Su-Jeong Bak <sup>1,2,†</sup>, Sun-I Kim <sup>1,†</sup>, Su-yeong Lim <sup>1,2</sup>, Taehyo Kim <sup>1</sup>, Se-Hun Kwon <sup>2,\*</sup>, Duck Hyun Lee <sup>1,\*</sup>

<sup>1</sup> Green Materials and Processes R&D Group, Korea Institute of Industrial Technology, Ulsan, 44413, Republic of Korea;

[baksj@kitech.re.kr](mailto:baksj@kitech.re.kr) (S.-J.B.); [sunikim@kitech.re.kr](mailto:sunikim@kitech.re.kr) (S.-I.K.); [swimmingly@kitech.re.kr](mailto:swimmingly@kitech.re.kr) (S.L.); [thkim0215@kitech.re.kr](mailto:thkim0215@kitech.re.kr) (T.K.)

<sup>2</sup> Department of Materials Science & Engineering, Pusan National University, Busan, Republic of Korea

\* Correspondence: [dulee@kitech.re.kr](mailto:dulee@kitech.re.kr) (D.H.L.); [sehun@pusan.ac.kr](mailto:sehun@pusan.ac.kr) (S.-H.K.);

Tel: +82-52-980-6709 (D.H.L.); +82-51-3775 (S.-H.K.)

† These authors contributed equally to this work.

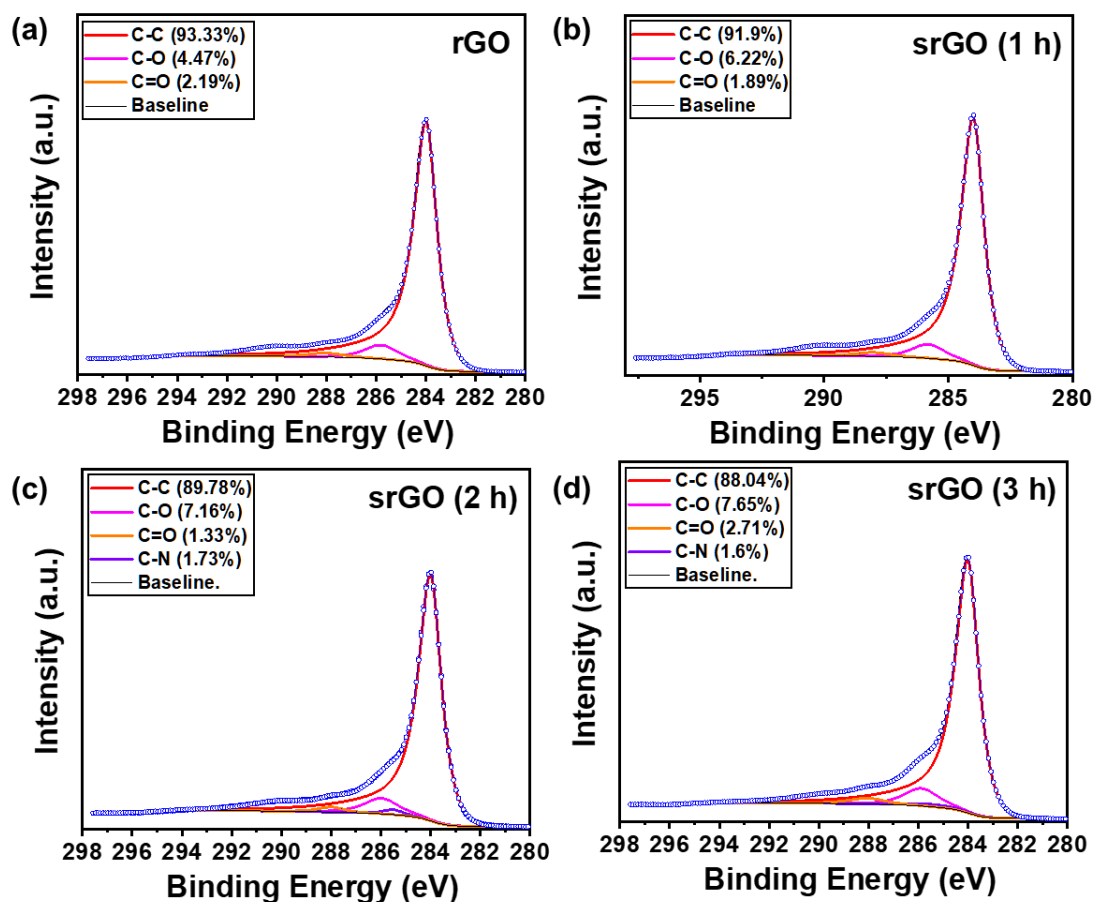

**Figure S1.** The C 1s region of the X-ray photoelectron spectroscopy (XPS) spectra of (a) reduced graphene oxide (rGO), (b) small rGO (srGO) (1 h), (c) srGO (2 h), and (d) srGO (3 h).

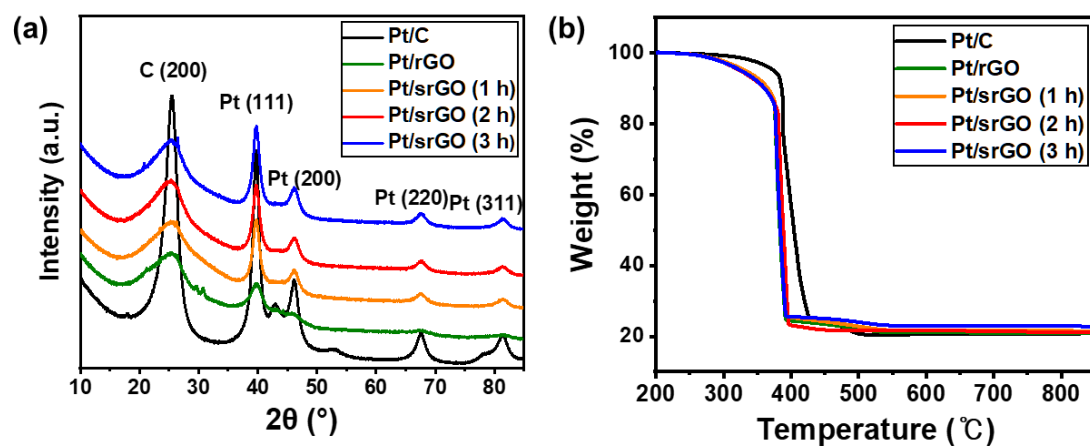

**Figure S2.** (a) X-ray diffraction (XRD) patterns and (b) thermogravimetric analysis (TGA) curves of the catalyst samples.

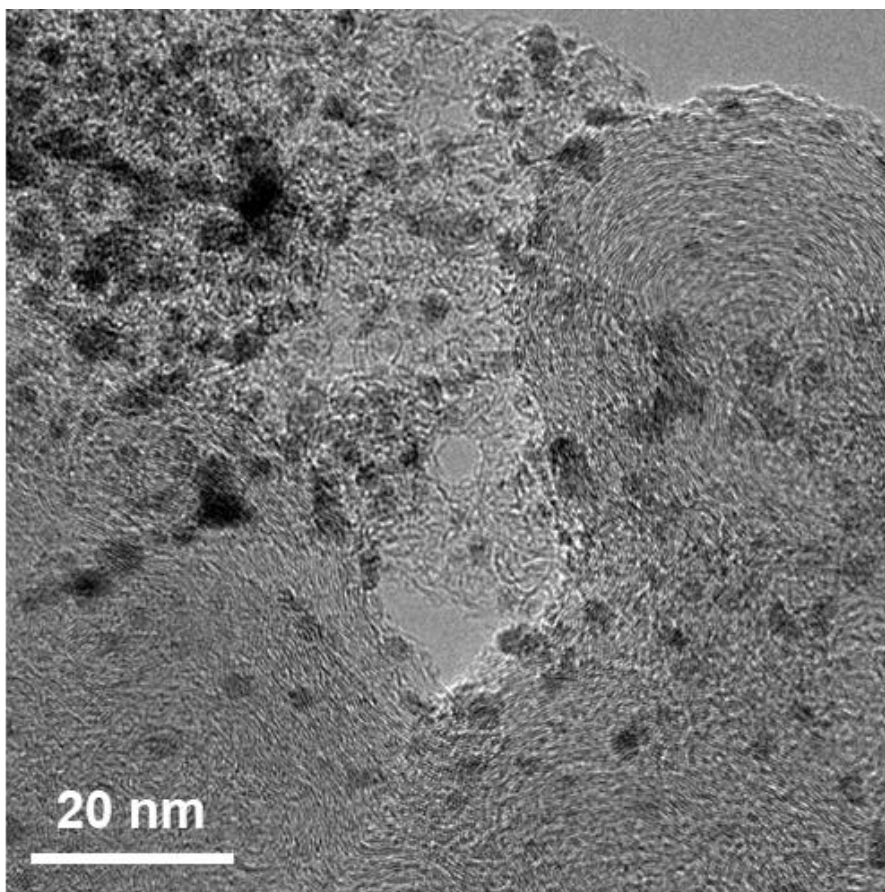

**Figure S3.** Scanning electron microscopy (SEM) image of Pt/C synthesized using the polyol process.

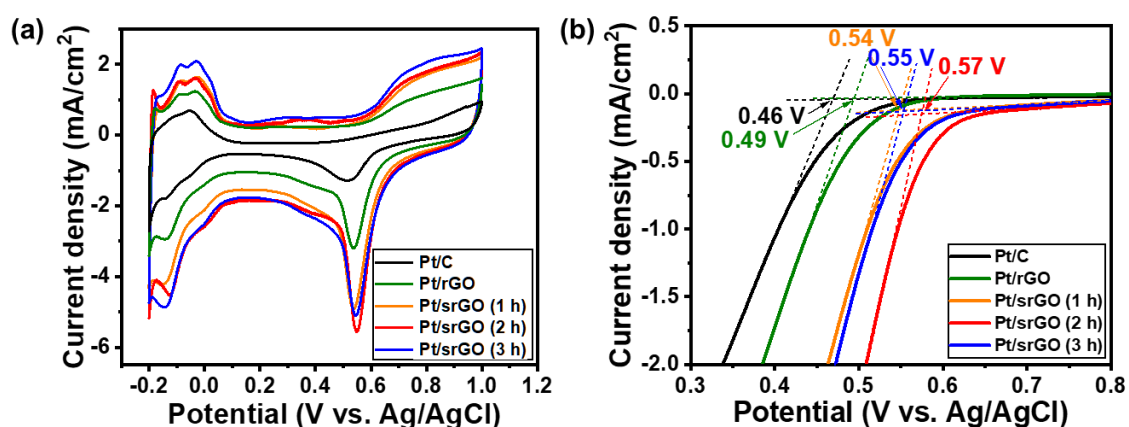

**Figure S4.** (a) Cyclic voltammetry (CV) curves of the catalyst samples in O<sub>2</sub>-saturated 0.5 M H<sub>2</sub>SO<sub>4</sub> collected at a scan rate of 20 mV/s. (b) Onset potentials in the polarization curves of the catalyst samples in O<sub>2</sub>-saturated 0.5 M H<sub>2</sub>SO<sub>4</sub> collected at a scan rate of 5 mV/s and a glassy carbon electrode rotational speed of 1,600 rpm.
